# Supplementary material for: Infection of bat and human intestinal organoids by SARS-CoV-2
Source: Springer Nature journal article supplement (doi:10.1038/s41591-020-0912-6), 2020-05-13
Supplement: 41591_2020_912_MOESM1_ESM.pdf [file 41591_2020_912_MOESM1_ESM.pdf]

In the format provided by the authors and unedited.

# Infection of bat and human intestinal organoids by SARS-CoV-2

Jie Zhou <sup>1,2,6</sup> , Cun Li<sup>2,6</sup>, Xiaojuan Liu<sup>2,6</sup>, Man Chun Chiu <sup>2</sup>, Xiaoyu Zhao <sup>2</sup>, Dong Wang<sup>2</sup>, Yuxuan Wei<sup>2</sup>, Andrew Lee <sup>2</sup>, Anna Jinxia Zhang<sup>1,2</sup>, Hin Chu<sup>1,2</sup>, Jian-Piao Cai<sup>2</sup>, Cyril Chik-Yan Yip<sup>2</sup>, Ivy Hau-Yee Chan<sup>3</sup>, Kenneth Kak-Yuen Wong <sup>3</sup>, Owen Tak-Yin Tsang<sup>4</sup>, Kwok-Hung Chan <sup>2</sup>, Jasper Fuk-Woo Chan<sup>1,2,5</sup>, Kelvin Kai-Wang To<sup>1,2,5</sup>, Honglin Chen <sup>1,2</sup> and Kwok Yung Yuen <sup>1,2,5</sup> 

---

<sup>1</sup>State Key Laboratory of Emerging Infectious Diseases, The University of Hong Kong, Hong Kong, China. <sup>2</sup>Department of Microbiology, Li Ka Shing Faculty of Medicine, The University of Hong Kong, Pokfulam, Hong Kong, China. <sup>3</sup>Department of Surgery, Li Ka Shing Faculty of Medicine, The University of Hong Kong, Hong Kong, China. <sup>4</sup>Department of Medicine and Geriatrics, Princess Margaret Hospital, Hong Kong, China. <sup>5</sup>Carol Yu Centre for Infection, The University of Hong Kong, Pokfulam, Hong Kong, China. <sup>6</sup>These authors contributed equally: Jie Zhou, Cun Li, Xiaojuan Liu. e-mail: [jiezhou@hku.hk](mailto:jiezhou@hku.hk); [kyyuen@hku.hk](mailto:kyyuen@hku.hk)

## Supplementary Fig. 1

To exclude the possibility that human and bat intestinal organoids used in the virus isolation carry any coronavirus which causes false positive result, we detected a 440bp fragment in RdRp gene highly conserved among several genera of coronaviruses, using a pair of primers (5'-GGTTGGGACTATCCTAAGTGTGA-3' 5'-ACCATCATCNGANARDATCATNA-3') as described previously<sup>1,2</sup>. It is shown that two lines of human enteroids (Hu-ERD) and two lines of bat enteroids (Bat-ERD) don't carry coronaviruses. SARS-CoV-2 propagated in Vero E6 cells serves as a positive control. Independent experiment was performed 3 times with the same result.

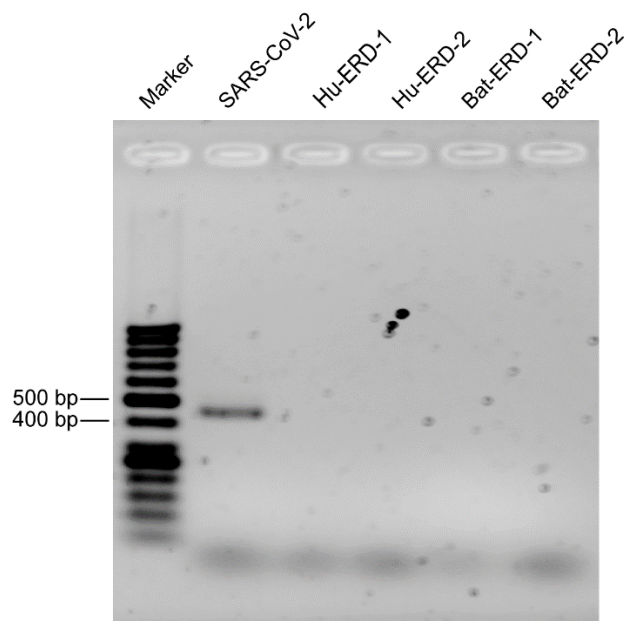

## References:

- 1 Woo, P. C. *et al.* Characterization and complete genome sequence of a novel coronavirus, coronavirus HKU1, from patients with pneumonia. *J Virol* **79**, 884-895, doi:10.1128/JVI.79.2.884-895.2005 (2005).
- 2 Lau, S. K. P. *et al.* Novel Bat Alphacoronaviruses in Southern China Support Chinese Horseshoe Bats as an Important Reservoir for Potential Novel Coronaviruses. *Viruses* **11**, doi:10.3390/v11050423 (2019).
