# Supplementary material for: Infection of bat and human intestinal organoids by SARS-CoV-2
Source: Springer Nature journal article supplement (doi:10.1038/s41591-020-0912-6), 2020-05-13
Supplement: 41591_2020_912_MOESM2_ESM.pdf [file 41591_2020_912_MOESM2_ESM.pdf]

## Reporting Summary

Nature Research wishes to improve the reproducibility of the work that we publish. This form provides structure for consistency and transparency in reporting. For further information on Nature Research policies, see [Authors & Referees](#) and the [Editorial Policy Checklist](#).

### Statistics

For all statistical analyses, confirm that the following items are present in the figure legend, table legend, main text, or Methods section.

n/a Confirmed

- The exact sample size ( $n$ ) for each experimental group/condition, given as a discrete number and unit of measurement
- A statement on whether measurements were taken from distinct samples or whether the same sample was measured repeatedly
- The statistical test(s) used AND whether they are one- or two-sided  
*Only common tests should be described solely by name; describe more complex techniques in the Methods section.*
- A description of all covariates tested
- A description of any assumptions or corrections, such as tests of normality and adjustment for multiple comparisons
- A full description of the statistical parameters including central tendency (e.g. means) or other basic estimates (e.g. regression coefficient) AND variation (e.g. standard deviation) or associated estimates of uncertainty (e.g. confidence intervals)
- For null hypothesis testing, the test statistic (e.g.  $F$ ,  $t$ ,  $r$ ) with confidence intervals, effect sizes, degrees of freedom and  $P$  value noted  
*Give  $P$  values as exact values whenever suitable.*
- For Bayesian analysis, information on the choice of priors and Markov chain Monte Carlo settings
- For hierarchical and complex designs, identification of the appropriate level for tests and full reporting of outcomes
- Estimates of effect sizes (e.g. Cohen's  $d$ , Pearson's  $r$ ), indicating how they were calculated

*Our web collection on [statistics for biologists](#) contains articles on many of the points above.*

### Software and code

Policy information about [availability of computer code](#)

Data collection

no software is used.

Data analysis

GraphPad Prism 7.0

For manuscripts utilizing custom algorithms or software that are central to the research but not yet described in published literature, software must be made available to editors/reviewers. We strongly encourage code deposition in a community repository (e.g. GitHub). See the Nature Research [guidelines for submitting code & software](#) for further information.

### Data

Policy information about [availability of data](#)

All manuscripts must include a [data availability statement](#). This statement should provide the following information, where applicable:

- Accession codes, unique identifiers, or web links for publicly available datasets
- A list of figures that have associated raw data
- A description of any restrictions on data availability

The data supporting the findings of this study are available from the corresponding authors upon written request.

### Field-specific reporting

Please select the one below that is the best fit for your research. If you are not sure, read the appropriate sections before making your selection.

- Life sciences       Behavioural & social sciences       Ecological, evolutionary & environmental sciences

For a reference copy of the document with all sections, see [nature.com/documents/nr-reporting-summary-flat.pdf](https://nature.com/documents/nr-reporting-summary-flat.pdf)

# Life sciences study design

All studies must disclose on these points even when the disclosure is negative.

|                 |                                                                                                                                                                                                                                                                                    |
|-----------------|------------------------------------------------------------------------------------------------------------------------------------------------------------------------------------------------------------------------------------------------------------------------------------|
| Sample size     | No experiment presented in this study requires sample size to be determined                                                                                                                                                                                                        |
| Data exclusions | no excluded data                                                                                                                                                                                                                                                                   |
| Replication     | All infection experiments were repeated at least two independent times. All attempts at replication were successful. Electron Microscopy was performed once, whereas there are at least 5 images for each cell type. The multiplex PCR array was performed one time in triplicate. |
| Randomization   | No experiment presented in this study requires randomization.                                                                                                                                                                                                                      |
| Blinding        | The results are either presented in quantitative data or with a negative control. Blinding is not required.                                                                                                                                                                        |

## Reporting for specific materials, systems and methods

We require information from authors about some types of materials, experimental systems and methods used in many studies. Here, indicate whether each material, system or method listed is relevant to your study. If you are not sure if a list item applies to your research, read the appropriate section before selecting a response.

### Materials & experimental systems

|                                     |                                                                 |
|-------------------------------------|-----------------------------------------------------------------|
| n/a                                 | Involved in the study                                           |
| <input type="checkbox"/>            | <input checked="" type="checkbox"/> Antibodies                  |
| <input type="checkbox"/>            | <input checked="" type="checkbox"/> Eukaryotic cell lines       |
| <input checked="" type="checkbox"/> | <input type="checkbox"/> Palaeontology                          |
| <input type="checkbox"/>            | <input checked="" type="checkbox"/> Animals and other organisms |
| <input type="checkbox"/>            | <input checked="" type="checkbox"/> Human research participants |
| <input checked="" type="checkbox"/> | <input type="checkbox"/> Clinical data                          |

### Methods

|                                     |                                                 |
|-------------------------------------|-------------------------------------------------|
| n/a                                 | Involved in the study                           |
| <input checked="" type="checkbox"/> | <input type="checkbox"/> ChIP-seq               |
| <input checked="" type="checkbox"/> | <input type="checkbox"/> Flow cytometry         |
| <input checked="" type="checkbox"/> | <input type="checkbox"/> MRI-based neuroimaging |

## Antibodies

Antibodies used

| Antibodies                         | Company/Supplier | Catalog number | LOT number  | Dilution |
|------------------------------------|------------------|----------------|-------------|----------|
| ACE2                               | R&D Systems      | AF933          | HOK0420021  | 1:100    |
| TMPRSS2                            | Invitrogen       | PA5-14264      | SI2433682G  | 1:100    |
| Villin                             | Abcam            | ab130751       | GR3229609-9 | 1:100    |
| Goat anti-Mouse 488                | Invitrogen       | A-11001        | 2090562     | 1:500    |
| Goat anti-Rabbit 488               | Invitrogen       | A-11034        | 1885241     | 1:500    |
| Goat anti-Rabbit 594               | Invitrogen       | A-11037        | 1608397     | 1:500    |
| Donkey anti-Goat 488               | Invitrogen       | A-11055        | 1771339     | 1:500    |
| mouse anti-viral NP in-house made  | n.a              | n.a            | n.a         | 1:10000  |
| rabbit anti-viral NP in-house made | n.a              | n.a            | n.a         | 1:10000  |

Validation

1) the application of commercial antibodies for IF staining has been validated by the providers.  
2) the validation result of in-house generated antibodies will be provided upon request.

## Eukaryotic cell lines

Policy information about [cell lines](#)

|                                                                      |                                                                                                                                    |
|----------------------------------------------------------------------|------------------------------------------------------------------------------------------------------------------------------------|
| Cell line source(s)                                                  | Vero cells from ATCC ( <a href="https://www.atcc.org/products/all/CCL-81.aspx">https://www.atcc.org/products/all/CCL-81.aspx</a> ) |
| Authentication                                                       | The cells are purchased from ATCC.                                                                                                 |
| Mycoplasma contamination                                             | we verified the cells free of mycoplasma contamination by using the mycoplasma screening service provided by HKU core facilities.  |
| Commonly misidentified lines<br>(See <a href="#">ICLAC</a> register) | No commonly misidentified lines were used.                                                                                         |

## Animals and other organisms

Policy information about [studies involving animals](#); [ARRIVE guidelines](#) recommended for reporting animal research

|                         |                                                                                                                                                                                                                                                                                                                                                                                                                                                                                                                                                                                                                                                             |
|-------------------------|-------------------------------------------------------------------------------------------------------------------------------------------------------------------------------------------------------------------------------------------------------------------------------------------------------------------------------------------------------------------------------------------------------------------------------------------------------------------------------------------------------------------------------------------------------------------------------------------------------------------------------------------------------------|
| Laboratory animals      | no lab animal involved.                                                                                                                                                                                                                                                                                                                                                                                                                                                                                                                                                                                                                                     |
| Wild animals            | Three female and male horseshoe bats ( <i>Rhinolophus sinicus</i> ) were captured in roosting caves with hand-nets on long pole by bat experts of Agriculture, Fisheries and Conservation Department, the Government of Hong Kong Special Administrative Region. The captured bats were kept in cloth bags individually and were transferred by the technical staff to HKU laboratory right after the capture. The organs were applied to establishing organoid culture after the bats were euthanized in biosafety hood by intraperitoneal injecting overdosed pentobarbitone sodium (100-150mg/kg) . We have obtained the ethnic approval for this study. |
| Field-collected samples | no field-collected sample involved.                                                                                                                                                                                                                                                                                                                                                                                                                                                                                                                                                                                                                         |
| Ethics oversight        | Approved by Agriculture, Fisheries and Conservation Department, the Government of Hong Kong Special Administrative Region,                                                                                                                                                                                                                                                                                                                                                                                                                                                                                                                                  |

Note that full information on the approval of the study protocol must also be provided in the manuscript.

## Human research participants

Policy information about [studies involving human research participants](#)

|                            |                                                                                                                                                                                                                              |
|----------------------------|------------------------------------------------------------------------------------------------------------------------------------------------------------------------------------------------------------------------------|
| Population characteristics | Four COVID-19 patients who were confirmed by laboratory test. This study only used the patients' respiratory and fecal specimens for virus isolation and analysis. Patients themselves were not involved in any experiments. |
| Recruitment                | The patients are confirmed cases of SARS-CoV-2 infection in two public hospital in Hong Kong.                                                                                                                                |
| Ethics oversight           | Institutional Review Board of the University of Hong Kong/Hospital Authority Hong Kong West Cluster (UW 13-372)                                                                                                              |

Note that full information on the approval of the study protocol must also be provided in the manuscript.
